# Supplementary material for: Group 4 bis(chelate) metal complexes of monoanionic bidentate [E,O−] ligands (E = O, S): synthesis and application as α-olefin polymerization catalysts
Source: Royal Society of Chemistry journal article supplement (doi:10.1039/b908510f), 2009-01-01
Supplement: b908510f.pdf [file b908510f.pdf]

# **Group 4 bis(chelate) metal complexes of monoanionic bidentate [E, O<sup>-</sup>] ligands (E = O, S): synthesis and application as $\alpha$ -olefin polymerization catalysts.**

**Marina Lamberti,\* Mina Mazzeo and Claudio Pellecchia**

## **SUPPORTING INFO**

$^1\text{H}$  NMR spectrum of complex **1**

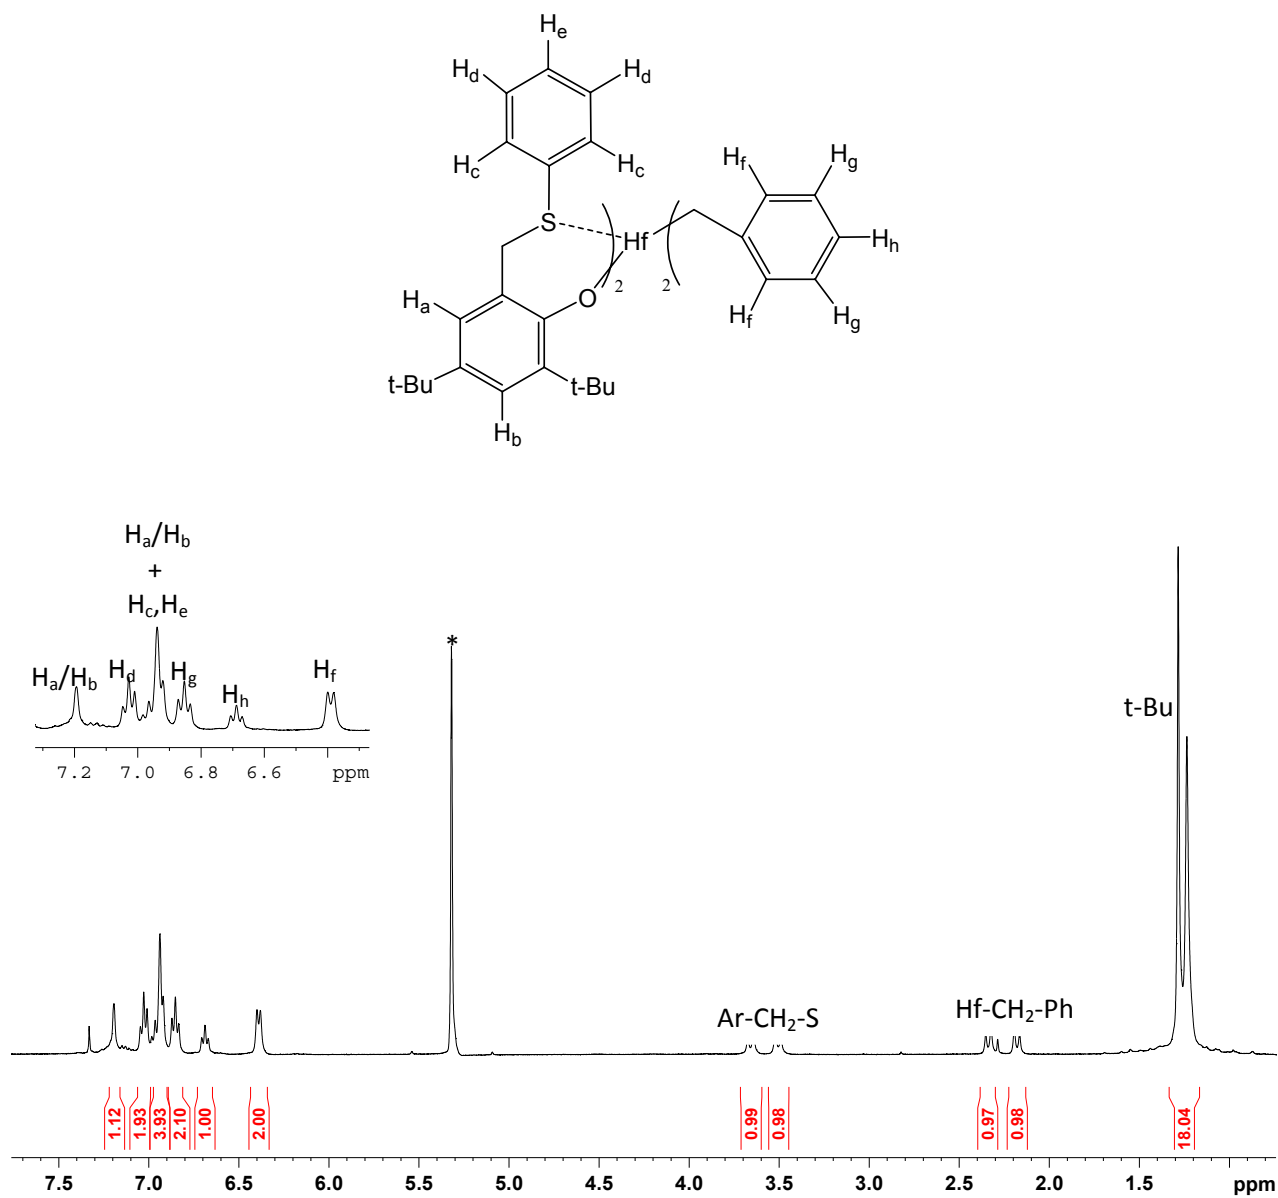

Fig S1.  $^1\text{H}$  NMR (400 MHz) spectra of complex **1** in  $\text{CD}_2\text{Cl}_2$  (\*) at  $-65\text{ }^\circ\text{C}$ .

$^1\text{H}$  NMR spectrum of complex **2**

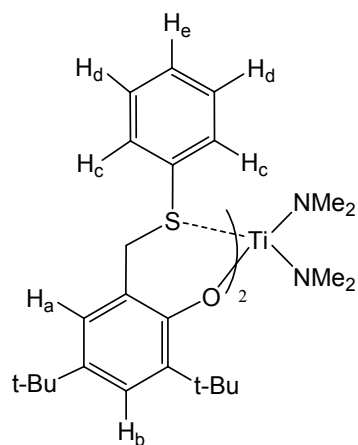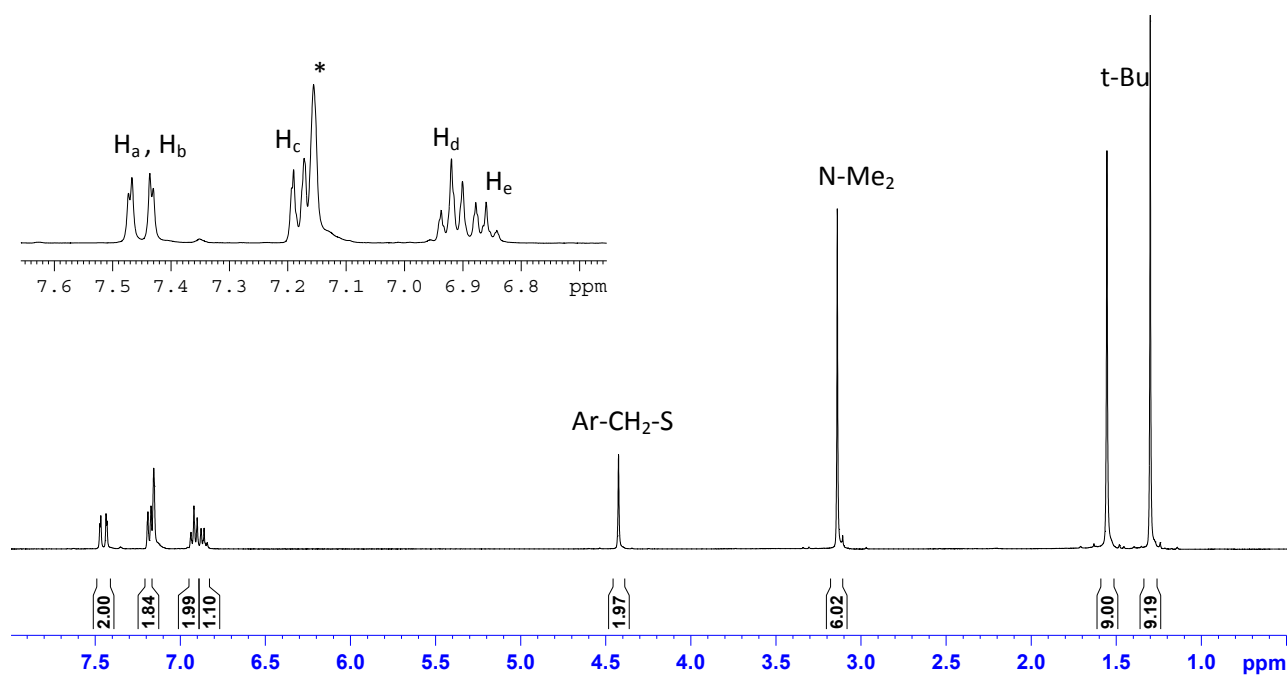

Fig S2.  $^1\text{H}$  NMR (400 MHz) spectra of complex **2** in  $\text{C}_6\text{D}_6$  (\*) at 25 °C.

$^1\text{H}$  NMR spectrum of complex **3**

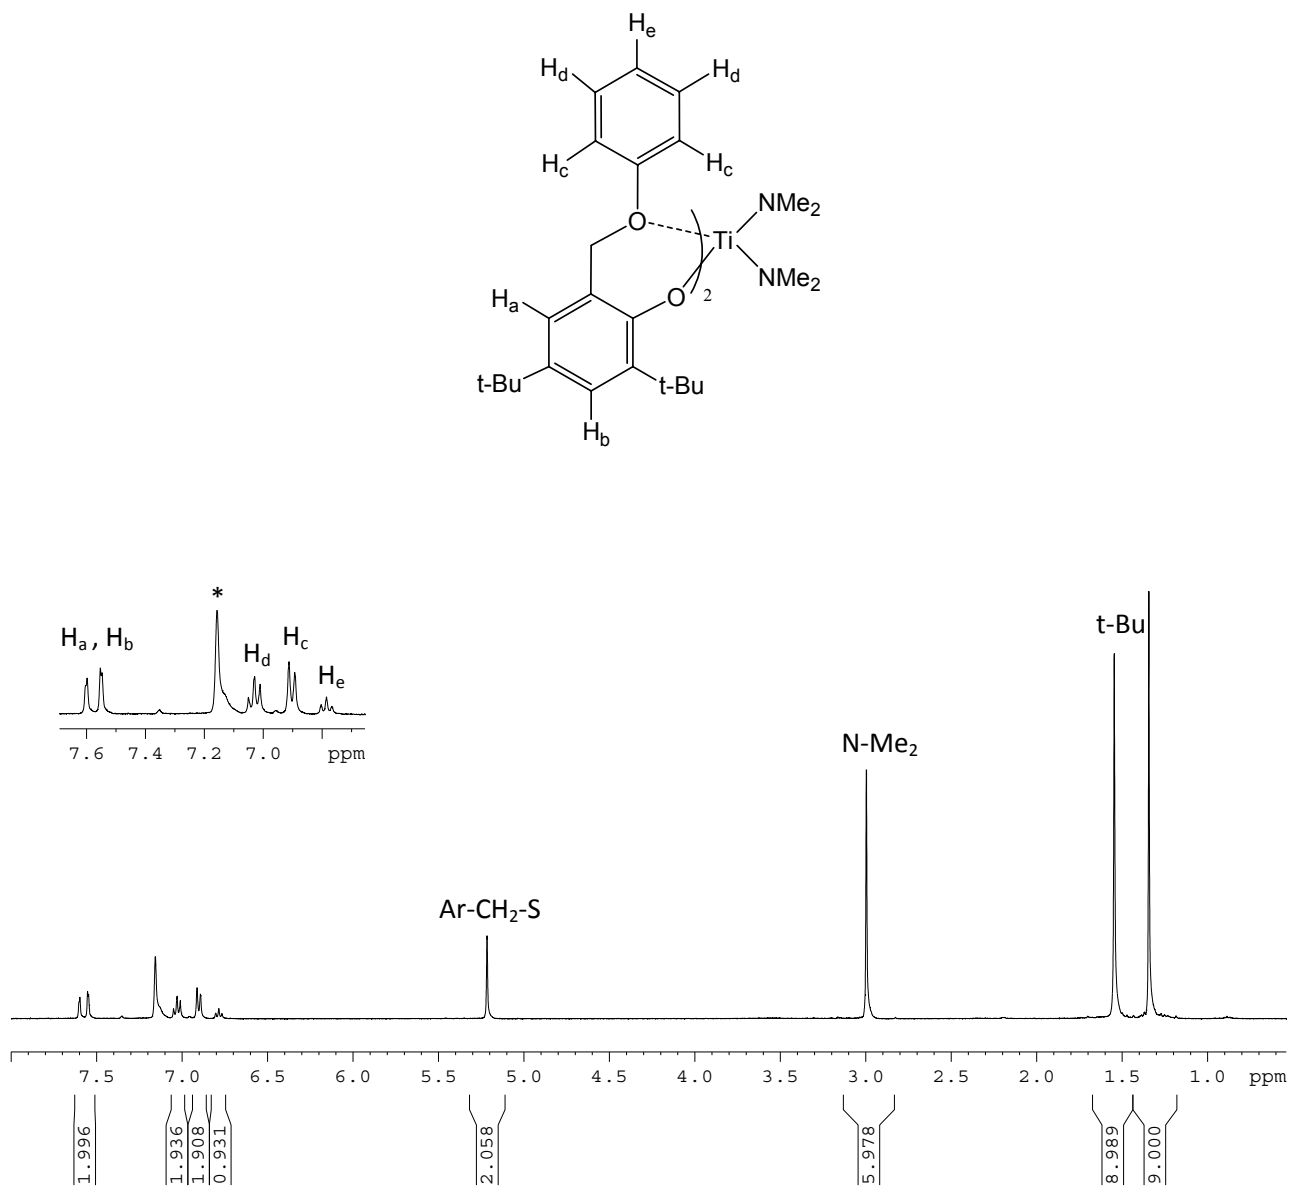

Fig S3.  $^1\text{H}$  NMR (400 MHz) spectra of complex **3** in  $\text{C}_6\text{D}_6$  (\*) at 25 °C.

$^1\text{H}$  NMR spectrum of complex **4**

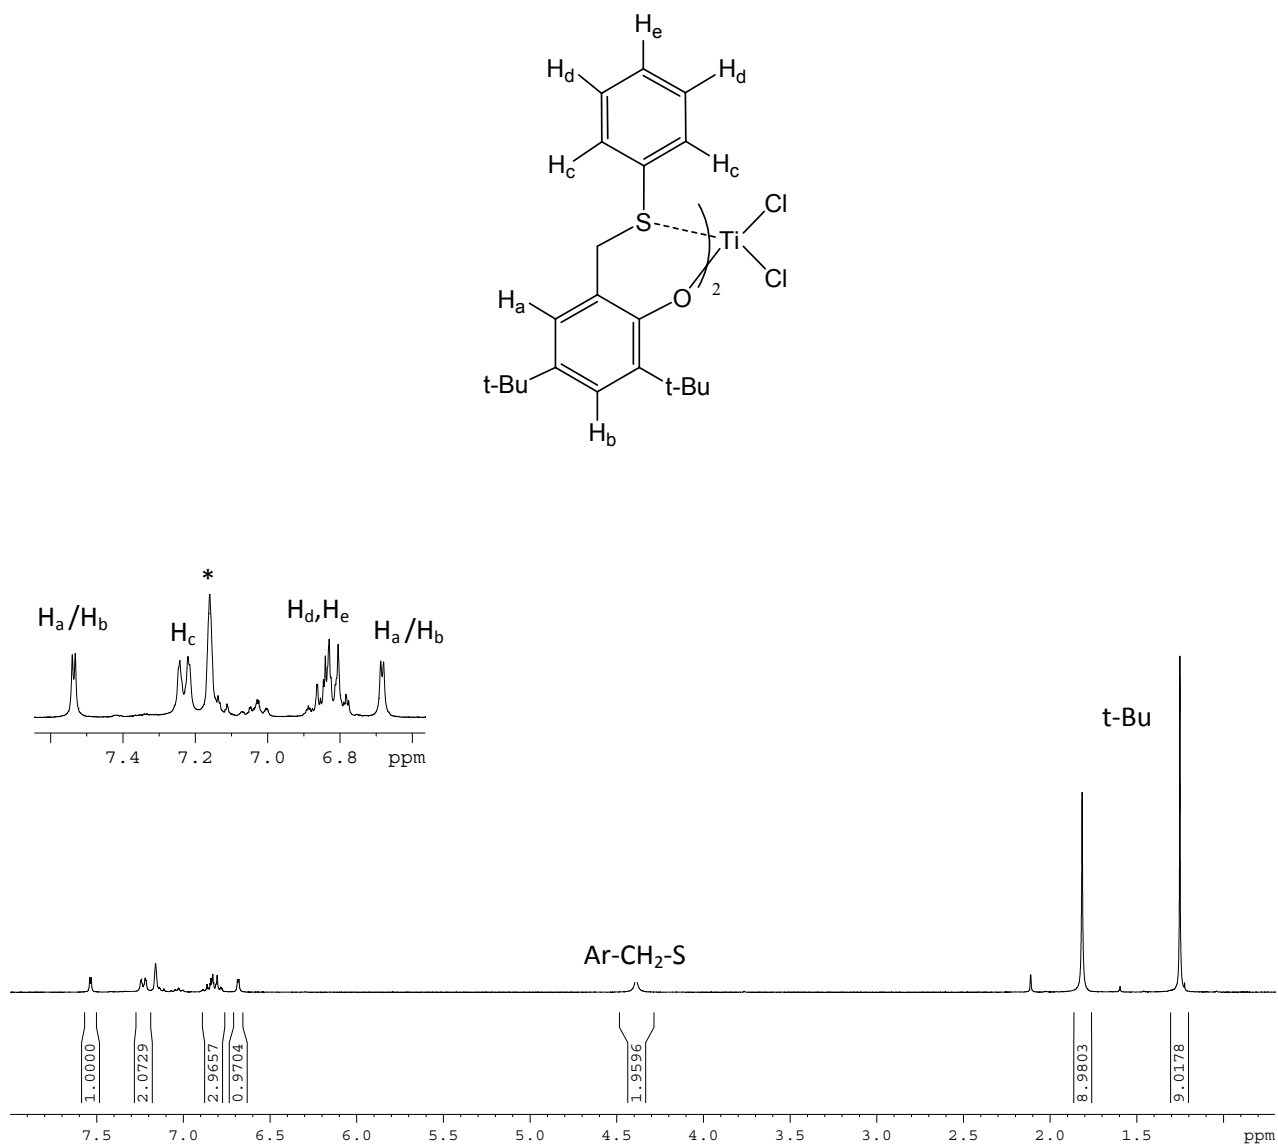

Fig S4.  $^1\text{H}$  NMR (400 MHz) spectra of complex **4** in  $\text{C}_6\text{D}_6$  (\*) at 25 °C.

Eyring plot for complex **1** in CD<sub>2</sub>Cl<sub>2</sub>.

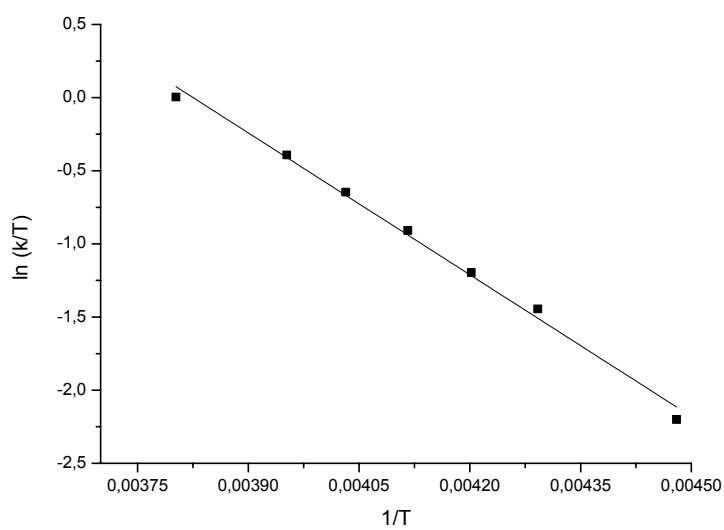

Fig S5. Eyring plot for complex **1** in CD<sub>2</sub>Cl<sub>2</sub>.

$$y = a x + b$$

| Parameter | Value     | Error |
|-----------|-----------|-------|
| a         | 11.938    | 0.212 |
| b         | -3121.088 | 51.58 |

$$R = 0.99891$$
